# Supplementary material
Source: PubMed Central journal article supplement (PMC4919424)
Supplement: mmc1.pdf [file mmc1.pdf]

**Biophysical Journal, Volume 110**

**Supplemental Information**

**Membrane-Spanning Sequences in Endoplasmic Reticulum Proteins  
Promote Phospholipid Flip-Flop**

**Hiroyuki Nakao, Keisuke Ikeda, Yasushi Ishihama, and Minoru Nakano**

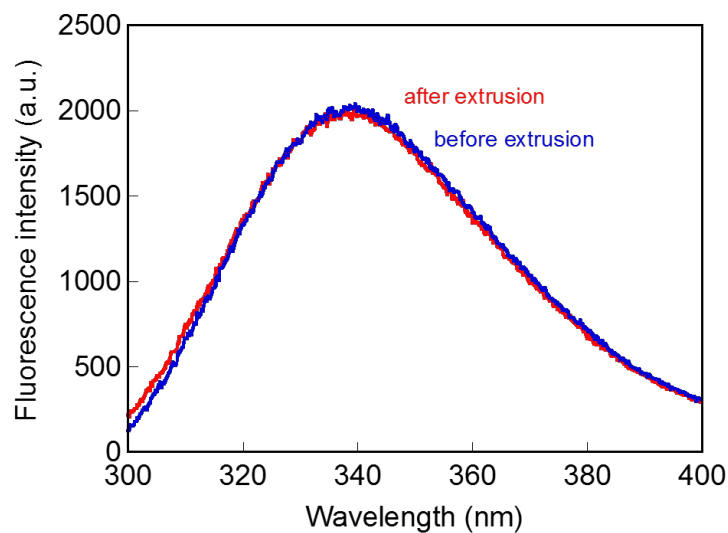

FIGURE S1 Trp fluorescence spectra of EDEM1 before and after extrusion of vesicles. EDEM1/lipid mixture (0.2 mol% EDEM1) was hydrated with a HEPES-NaOH buffer. The suspension was either directly solubilized by adding heptaethylene glycol monododecyl ether (HED) or extruded to form LUVs as described in MATERIALS AND METHODS section in the main text, and then solubilized with HED. Fluorescence spectra of the solubilized samples were recorded at phospholipid concentration of 500  $\mu$ M in the presence of 1 v/v% HED.

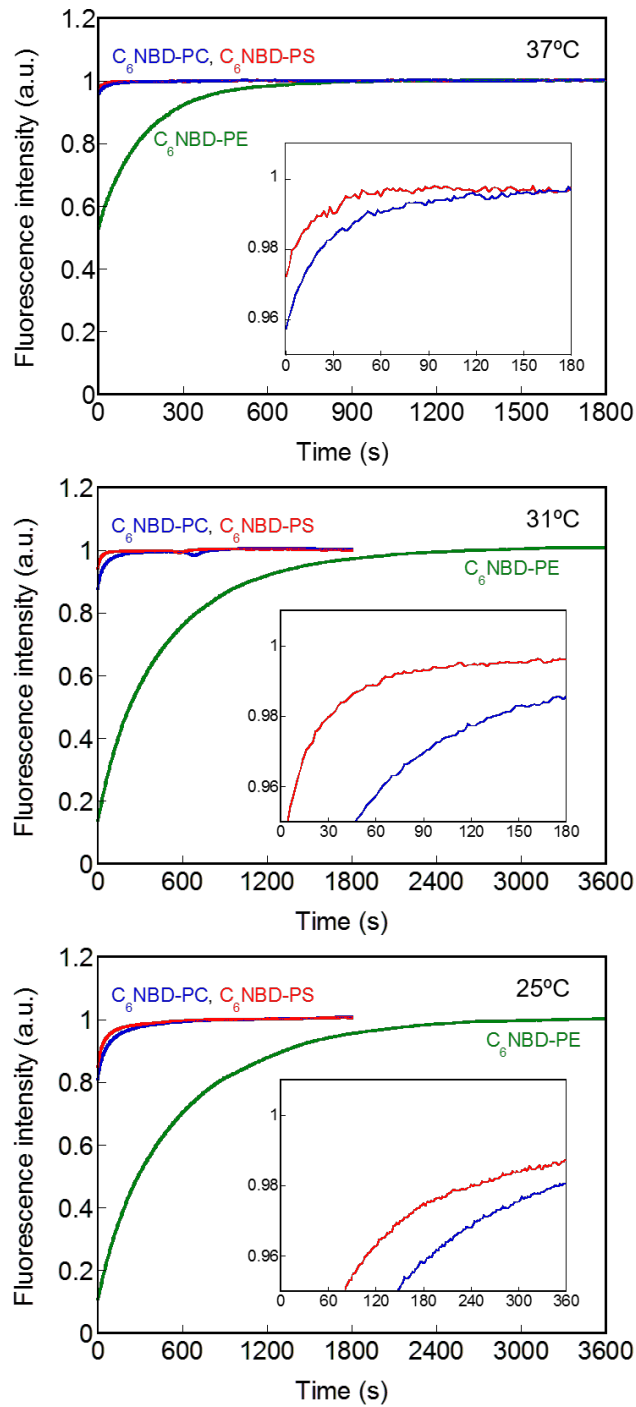

FIGURE S2 Incorporation of C<sub>6</sub>NBD-PC, -PE, and -PS into LUVs at 25, 31, 37°C. Fluorescence intensity was monitored over time after fluorescent lipids were added, and the data were normalized to the intensity detected at the end of the measurement periods ( $t = 1800$  or  $3600$  s). Insets are expanded traces of the initial time period.

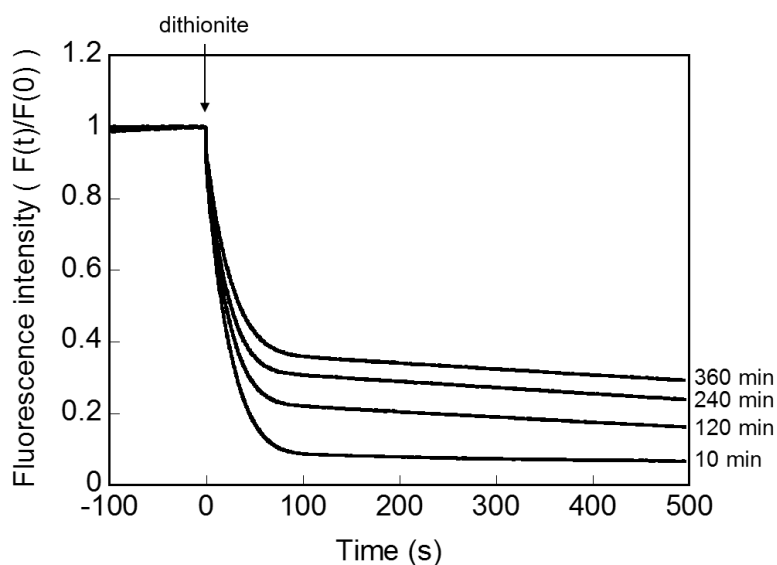

FIGURE S3 Representative dithionite-quenching profiles of C<sub>6</sub>NBD-PC fluorescence following incubation with LUVs containing 0.025 mol% EDEM1 for 10, 120, 240, or 360 min at 37°C. The fluorescence intensity ( $F(t)$ ) was monitored as a function of time after dithionite was added and was normalized to the intensity measured at  $t = 0$ . The profiles were fitted using the following equation:

$$F(t) / F(0) = (1 - \Phi_{\text{inner}}) \exp(-k_{\text{q}}t) + \Phi_{\text{inner}} \exp(-k_{\text{flop}}t)$$

where  $\Phi_{\text{inner}}$ ,  $k_{\text{q}}$ , and  $k_{\text{flop}}$  are fitting parameters;  $k_{\text{q}}$  and  $k_{\text{flop}}$  are the rate constant of the dithionite quenching of fluorescent lipids in the outer leaflet and the flop rate constant, respectively; and  $\Phi_{\text{inner}}$  is the mole fraction of the fluorescent lipids in the inner leaflet.

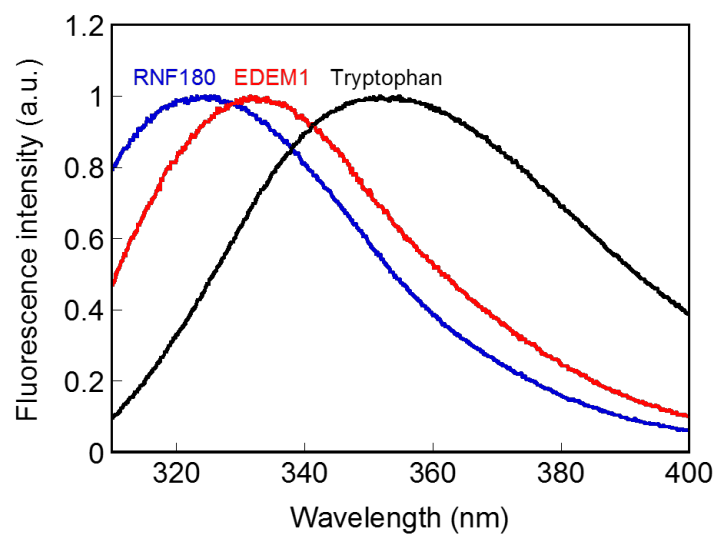

FIGURE S4 Trp fluorescence spectra of RNF180 and EDEM1 in LUVs, and free tryptophan in aqueous solution. The peptide/lipid ratio was 0.1 mol%.

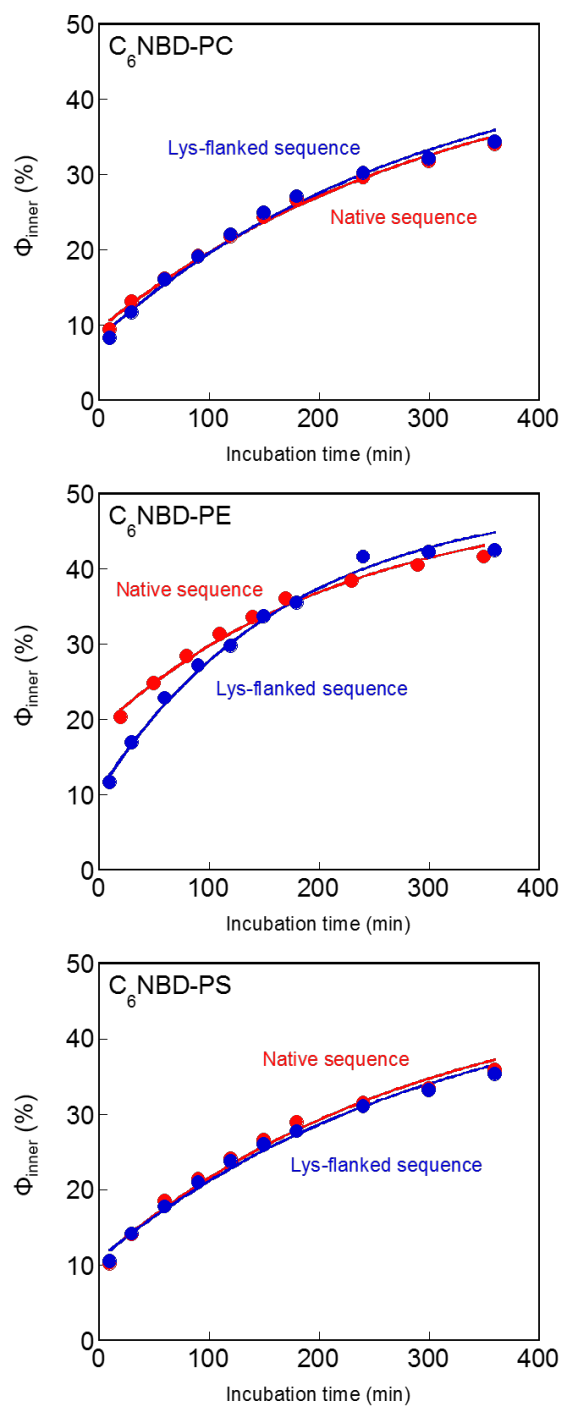

FIGURE S5 Flip assays for C<sub>6</sub>NBD-PC, -PE, and -PS in LUVs containing 0.1 mol% ORP5 (Lys-flanked sequence) or ORP5 native sequence peptide at 37°C.

Lys-flanked sequence: Ac-KKSPRSWFLLCVFLACQLFINHILKKK-NH<sub>2</sub>

Native sequence: Ac-APTPGLLQSPRSWFLLCVFLACQLFINHILK-NH<sub>2</sub>

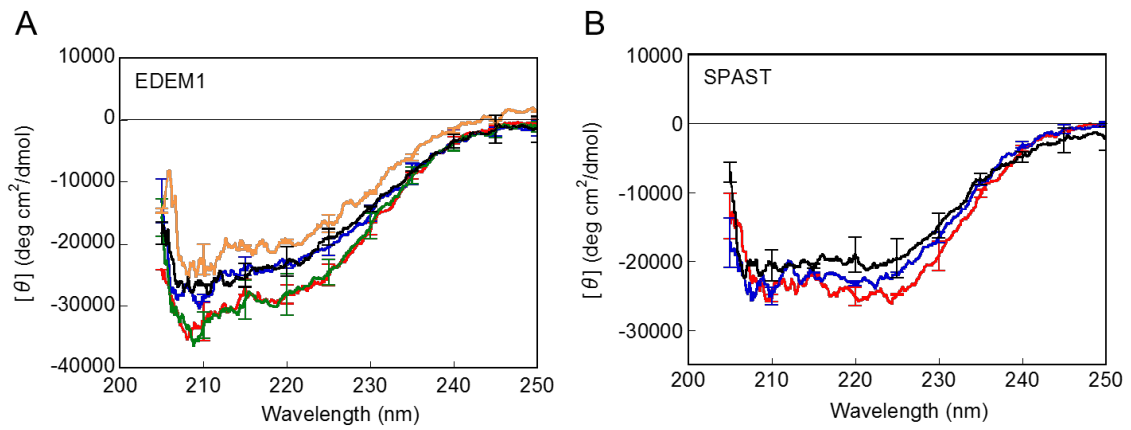

FIGURE S6 CD spectra of EDEM1, SPAST, and their mutant peptides in LUVs. The peptide/lipid ratio was 0.2 mol%. (A) EDEM1 WT (*black*), R10A (*red*), H14A (*blue*), or R10E (*green*) in the absence of cholesterol, or EDEM1 WT in the presence of 20 mol% cholesterol (*orange*). (B) SPAST WT (*black*), R13A (*red*), or H18A (*blue*). Error bars represent SDs from 2 experiments.

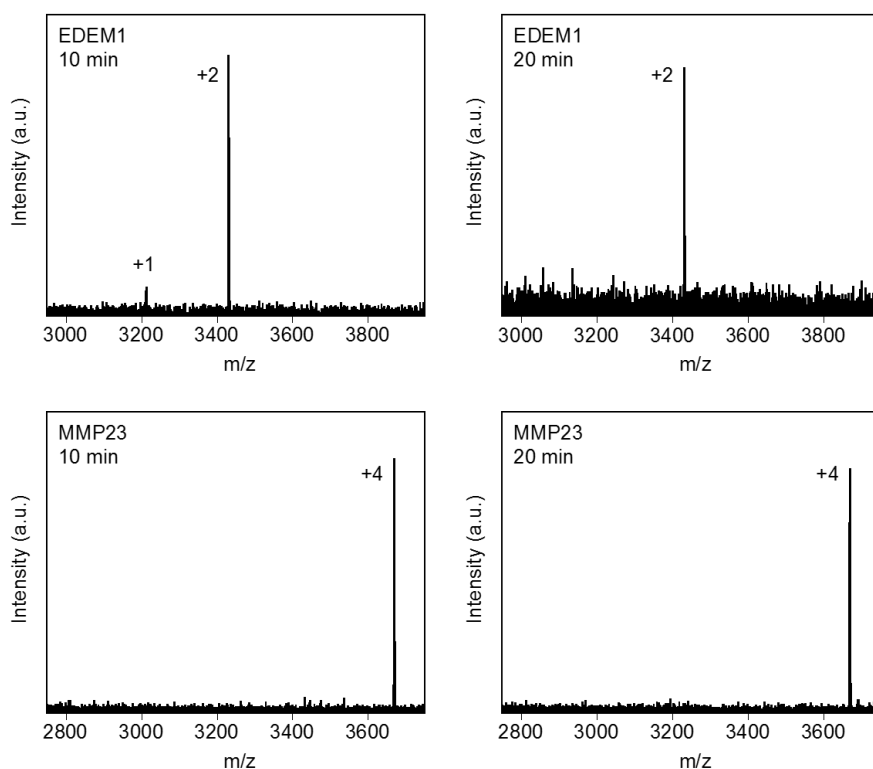

FIGURE S7 Evaluation of peptide topology in an artificial membrane by mass spectrometry. To POPC/cholesterol (4:1 molar ratio) LUVs (4.5 mM) with 0.1 mol% of peptide (EDEM1 [upper figures] or MMP23 [lower figures]) in Tricine-NaOH buffer, 250 mM mPEG<sub>4</sub>-NHS was added to obtain a final reagent/peptide ratio of 500:1. After a 10- (left) or 20-min (right) incubation at 25°C, the reaction was quenched by adding a 10-fold larger amount of NH<sub>4</sub>HCO<sub>3</sub> than that of mPEG<sub>4</sub>-NHS. Changes in the molecular mass of the peptides were analyzed using MALDI-TOF-MS. The mass spectra of the EDEM1 and MMP23 peptides with chol-20% LUVs after 10 and 20 min incubation with mPEG<sub>4</sub>-NHS are shown. The values +1, +2, and +4 represents the *m/z* ratios of the peptides combined with 1, 2, and 4 molecules of mPEG<sub>4</sub>-NHS, respectively.



TABLE S1 Flip rate constant of C<sub>6</sub>NBD-PC, C<sub>6</sub>NBD-PE, and C<sub>6</sub>NBD-PS in LUVs with/without synthesized peptides at 37°C

| Peptide (mol%) | $k_{\text{flip}} (\times 10^{-4} \text{ min}^{-1})$ |                       |                       |
|----------------|-----------------------------------------------------|-----------------------|-----------------------|
|                | C <sub>6</sub> NBD-PC                               | C <sub>6</sub> NBD-PE | C <sub>6</sub> NBD-PS |
| No peptide     | 4.36 ± 0.45                                         | 3.27 ± 0.25           | 4.06 ± 0.77           |
| ATF6           | 3.79 ± 0.87                                         | 6.82 ± 2.18           | 3.28 ± 1.27           |
| EDEM1          | 124                                                 | –                     | –                     |
| EDEM1 (0.06)   | 79.9                                                | –                     | –                     |
| EDEM1 (0.025)  | 21.2 ± 1.2                                          | 72.2 ± 13.1           | 72.2 ± 26.8           |
| EDEM1 (0.0175) | 15.9                                                | 55.4                  | 42.7                  |
| EDEM1 (0.01)   | 8.38                                                | 30.7                  | 20.6                  |
| FACL4          | 7.17 ± 3.46                                         | 19.1 ± 8.5            | 4.68 ± 1.41           |
| JP3            | 2.16 ± 0.21                                         | 4.47 ± 0.15           | 2.11 ± 0.41           |
| JP4            | 11.3 ± 0.6                                          | 34.3 ± 4.9            | 12.2 ± 3.14           |
| ORP5           | 19.8 ± 4.2                                          | 30.0 ± 1.2            | 21.7 ± 7.7            |
| P4HTM          | 10.0 ± 0.4                                          | 31.2 ± 1.8            | 6.47 ± 0.43           |
| RNF180         | 32.4 ± 6.6                                          | 30.9 ± 5.8            | 13.0 ± 2.0            |
| SPAST          | 23.2                                                | 55.5                  | 37.4                  |
| SPAST (0.05)   | 10.7 ± 2.3                                          | 37.6 ± 5.7            | 18.6 ± 2.6            |
| TMED7          | 9.36 ± 2.48                                         | 40.5 ± 7.7            | 5.61 ± 1.61           |
| UBE2J2         | 2.59 ± 0.70                                         | 5.11 ± 0.77           | 2.06 ± 0.55           |

The SDs shown are representative of 2 independent experiments. The peptide/lipid ratios are 0.1 mol%, unless otherwise indicated. Plots of these data are shown in Fig. 3 in the main text.

TABLE S2 Flip rate constant of C<sub>6</sub>NBD-PC, C<sub>6</sub>NBD-PE, and C<sub>6</sub>NBD-PS in LUVs with mutant peptides of SPAST and EDEM1 at 37°C

| Peptide (mol%)                             | $k_{\text{flip}} (\times 10^{-4} \text{ min}^{-1})$ |                       |                       |
|--------------------------------------------|-----------------------------------------------------|-----------------------|-----------------------|
|                                            | C <sub>6</sub> NBD-PC                               | C <sub>6</sub> NBD-PE | C <sub>6</sub> NBD-PS |
| SPAST R13A (0.1)                           | 3.82                                                | 4.53                  | 3.80                  |
| SPAST R13A (0.05)                          | 3.95                                                | 3.84                  | 3.79                  |
| SPAST H18A (0.1)                           | 6.17                                                | 37.4                  | 13.6                  |
| SPAST H18A (0.05)                          | 5.29                                                | 14.4                  | 6.19                  |
| EDEM1 R10A (0.1)                           | 4.18                                                | 5.10                  | 3.98                  |
| EDEM1 R10A (0.025)                         | 4.43                                                | 3.27                  | 3.63                  |
| EDEM1 H14A (0.025)                         | 7.43                                                | 29.3                  | 13.4                  |
| EDEM1 H14A (0.0175)                        | –                                                   | 21.3                  | –                     |
| EDEM1 H14A (0.01)                          | 4.34                                                | 11.8                  | 4.94                  |
| EDEM1 R10E (0.1)                           | 3.97                                                | –                     | 3.25                  |
| EDEM1 R10E (0.04)                          | –                                                   | 9.57                  | –                     |
| EDEM1 R10E (0.025)                         | 4.25                                                | 9.73                  | 4.02                  |
| EDEM1 R10A (0.025)<br>+ EDEM1 H14A (0.025) | 7.01 ± 0.66                                         | 30.3 ± 3.7            | 13.5 ± 0.3            |

The SDs shown are representative of 2 independent experiments. Plots of these data are shown in Fig. 4 in the main text.

TABLE S3 Flip rate constant of C<sub>6</sub>NBD-PC, C<sub>6</sub>NBD-PE, and C<sub>6</sub>NBD-PS in LUVs with/without 0.025 mol% EDEM1 at 25, 31, or 37°C

| Peptide (mol%) | Temperature (°C) | $k_{\text{flip}} (\times 10^{-4} \text{ min}^{-1})$ |                       |                       |
|----------------|------------------|-----------------------------------------------------|-----------------------|-----------------------|
|                |                  | C <sub>6</sub> NBD-PC                               | C <sub>6</sub> NBD-PE | C <sub>6</sub> NBD-PS |
| No peptide     | 37               | 4.36 ± 0.45                                         | 3.27 ± 0.25           | 4.06 ± 0.77           |
|                | 31               | 1.61                                                | 0.908                 | 1.26                  |
|                | 25               | 1.16                                                | 0.778                 | 1.14                  |
| EDEM1 (0.025)  | 37               | 21.2 ± 1.2                                          | 72.2 ± 13.1           | 72.2 ± 26.8           |
|                | 31               | 13.4                                                | 38.5                  | 48.6                  |
|                | 25               | 7.82                                                | 21.2                  | 29.7                  |

The SDs shown are representative of 2 independent experiments.

TABLE S4 Flip rate constant of C<sub>6</sub>NBD-PC, C<sub>6</sub>NBD-PE, and C<sub>6</sub>NBD-PS in LUVs containing 0–0.025 mol% EDEM1 in the presence of 5 or 20 mol% cholesterol at 37°C

| Peptide (mol%) | Cholesterol (mol%) | $k_{\text{flip}} (\times 10^{-4} \text{ min}^{-1})$ |                       |                       |
|----------------|--------------------|-----------------------------------------------------|-----------------------|-----------------------|
|                |                    | C <sub>6</sub> NBD-PC                               | C <sub>6</sub> NBD-PE | C <sub>6</sub> NBD-PS |
| No peptide     | 20                 | 3.22 ± 0.13                                         | 2.05 ± 0.32           | 3.04 ± 0.38           |
| EDEM1 (0.025)  | 5                  | 22.2                                                | 71.1                  | 83.8                  |
|                | 20                 | 6.53                                                | 17.8                  | 21.5                  |
| EDEM1 (0.015)  | 20                 | 4.66                                                | 11.0                  | 11.6                  |

The SDs shown are representative of 2 independent experiments. Plots of these data are shown in Fig. 6 in the main text.
